# Supplementary material
Source: bioRxiv or medRxiv preprint supplement (https://www.biorxiv.org/highwire/filestream/100647/field_highwire_adjunct_files/0/329409-1.pdf)
Supplement: Supplementary file [file 329409-1.pdf]

## **SUPPLEMENTARY INFORMATION**

### **Positive memory specificity reduces adolescent vulnerability to depression**

**Authors:** Adrian Dahl Askelund, Susanne Schweizer, Ian Goodyer & Anne-Laura van Harmelen

## **Supplementary Results:**

### *Confirmatory Factor Analysis of Morning Cortisol*

The confirmatory factor analysis of morning cortisol (see Supplementary Figure 1;  $n = 479$ ) showed good model fit at baseline without any modifications (robust model fit indices:  $\chi^2_6 = 331.484$ ,  $P < 0.001$ , CFI = 1, TLI = 1.006, RMSEA = 0[0.000-0.092], SRMR = 0.008) and good model fit at follow-up with one modification (robust model fit indices:  $\chi^2_6 = 253.014$ ,  $P < 0.001$ , CFI = 1, TLI = 1.012, RMSEA = 0[0.000-0.134], SRMR = 0.005). The model was re-specified once at follow-up (MI = 30.203), freeing the path between day one and two (improved model fit, ANOVA:  $\chi^2_2 = 28.685$ ,  $P < .001$ ). Strong longitudinal measurement invariance was established between baseline and follow-up (see Supplementary Table 2).

### *Comparison of Positive and Negative Memory Specificity*

To examine whether the effects in the path model (Figure 1 and Table 1, main manuscript) were due to memory specificity in general (and also found for negative memory specificity), or specific to positive memory specificity, we ran an exploratory model where both negative and positive memory specificity predicted current and later morning cortisol and negative self-cognitions during low mood. In this model, there was a relation between positive memory specificity and negative self-cognitions/mood (Effect = -0.133, S.E. = 0.040,  $z$ -value = -3.332,  $P = .001$ ) and morning cortisol (Effect = -0.324, S.E. = 0.137,  $z$ -value = -2.357,  $P = .018$ ) at follow-up. Negative memory specificity was unrelated to negative self-cognitions/mood (Effect = 0.016, S.E. = 0.041,  $z$ -value = -0.403,  $P = .687$ ) and morning cortisol (Effect = 0.013, S.E. = 0.143,  $z$ -value = 0.091,  $P = .927$ ) at follow-up. Relationships between positive memory specificity and negative self-cognitions/mood (Effect = -0.047, S.E. = 0.046,  $z$ -value = -1.041,  $P = .298$ ) and morning cortisol (Effect = -0.283, S.E. = 0.172,  $z$ -

value = -1.648,  $P = .099$ ) were not significant at baseline. Negative memory specificity was also unrelated to negative self-cognitions/mood (Effect = -0.033, S.E. = 0.046,  $z$ -value = -0.709,  $P = .479$ ) and morning cortisol (Effect = -0.092, S.E. = 0.161,  $z$ -value = -0.570,  $P = .569$ ) at baseline. Robust fit statistics indicated good fit ( $\chi^2_{30} = 267.409$ ,  $P < 0.001$ , CFI = 1, TLI = 1.054, RMSEA = 0[0.000-0.078], SRMR = 0.006). In this model, constraining the negative memory specificity paths to zero did not affect model fit (ANOVA:  $\chi^2_8 = 4.244$ ,  $P = .812$ ; robust fit statistics still indicated good fit:  $\chi^2_{34} = 271.654$ ,  $P < 0.001$ , CFI = 1, TLI = 1.066, RMSEA = 0[0.000-0.030], SRMR = 0.007), suggesting that negative memory specificity was not needed to explain our data. On the other hand, constraining the positive memory specificity paths to zero significantly lowered model fit (ANOVA:  $\chi^2_8 = 19.541$ ,  $P = .0045$ ; robust fit statistics indicated less than acceptable model fit:  $\chi^2_{34} = 272.290$ ,  $P < 0.001$ , CFI = 0.956, TLI = 0.813, RMSEA = .055[0.024-0.086], SRMR = 0.024). Furthermore, the lack of an effect of negative memory specificity was not due to the inclusion of positive memory specificity in the same model. When negative memory specificity was constrained to zero, positive memory specificity was related to negative self-cognitions during low mood (Effect = -0.126, S.E. = 0.038,  $z$ -value = -3.326,  $P = .001$ ) and morning cortisol (Effect = -0.319, S.E. = 0.122,  $z$ -value = -2.603,  $P = .009$ ) at follow-up. When positive memory specificity was constrained to zero, negative memory specificity was unrelated to negative self-cognitions/mood (Effect = -0.043, S.E. = 0.039,  $z$ -value = -1.077,  $P = .282$ ) and morning cortisol (Effect = -0.131, S.E. = 0.126,  $z$ -value = -1.040,  $P = .298$ ) at follow-up.

#### *Cross-Sectional Correlations in the Moderation and Moderated Mediation Models*

Correlations between negative life events and other follow-up measures were small to moderate (negative self-cognitions:  $r_{479} = .17$ ,  $P < .001$ ; dysphoric mood:  $r_{479} = .22$ ,  $P < .001$ ; depressive symptoms  $r_{479} = .21$ ,  $P < .001$ ; morning cortisol  $r_{479} = .16$ ,  $P < .001$ ). The

correlation between negative self-cognitions and depressive symptoms was large ( $r_{479} = .70$ ,  $P < .001$ ).

## **Supplementary Methods:**

### *Participant Recruitment*

Uptake from the schools was generally high (about 1:2; 1707 invited, 990 consented, 937 did school interview, 905 remained after exclusion, 888 after dropout at baseline and 812 after dropout at follow-up). The main sample studied here with 479 adolescents were those who had data on all measures including cortisol, stemming from an overall cohort of 643 adolescents who had data on all measures excluding cortisol.

### *Types of Negative Life Events*

1. Losses, involving only death or permanent separation from a valued other.
2. Disappointments, involving failure of previously held expectations and/or hopes, including breakdown of a romantic relationship or examination failure (affecting self), or loss of a job, new financial difficulties or an extramarital affair (affecting others).
3. Dangers to the self, involving a clear expectation or occurrence of a physical threat to the youth, including being affected by an illness or accident.
4. Dangers to others, similar events including an illness or accident affecting a parent, friend or significant other.

### *Cortisol Assay Specifications*

Cortisol was measured by enzyme-linked immunosorbent assay (ELISA) on 20- $\mu$ L samples of saliva without extraction (antibody; Cambio). Intraassay variation was 5.7% and interassay variation was 5.6%.

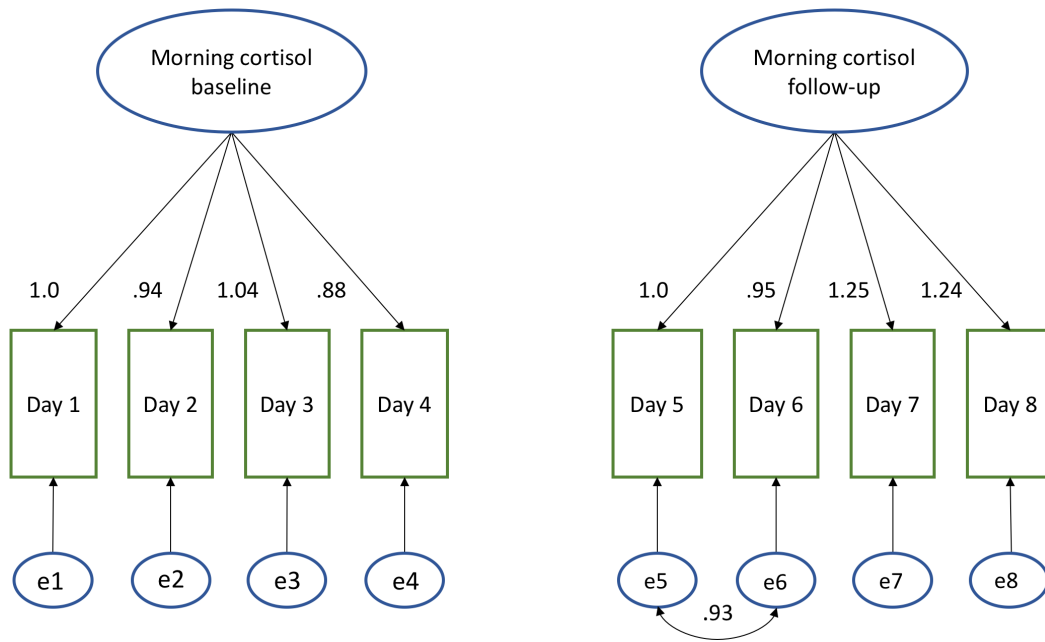

**Supplementary Figure 1. Confirmatory factor analysis of morning cortisol.** We extracted a stable factor of morning cortisol over four days at baseline and again at one year follow-up. Values are factor loadings on each indicator. The double-headed arrow between day 5 and day 6 indicates the modification to the model at follow-up.

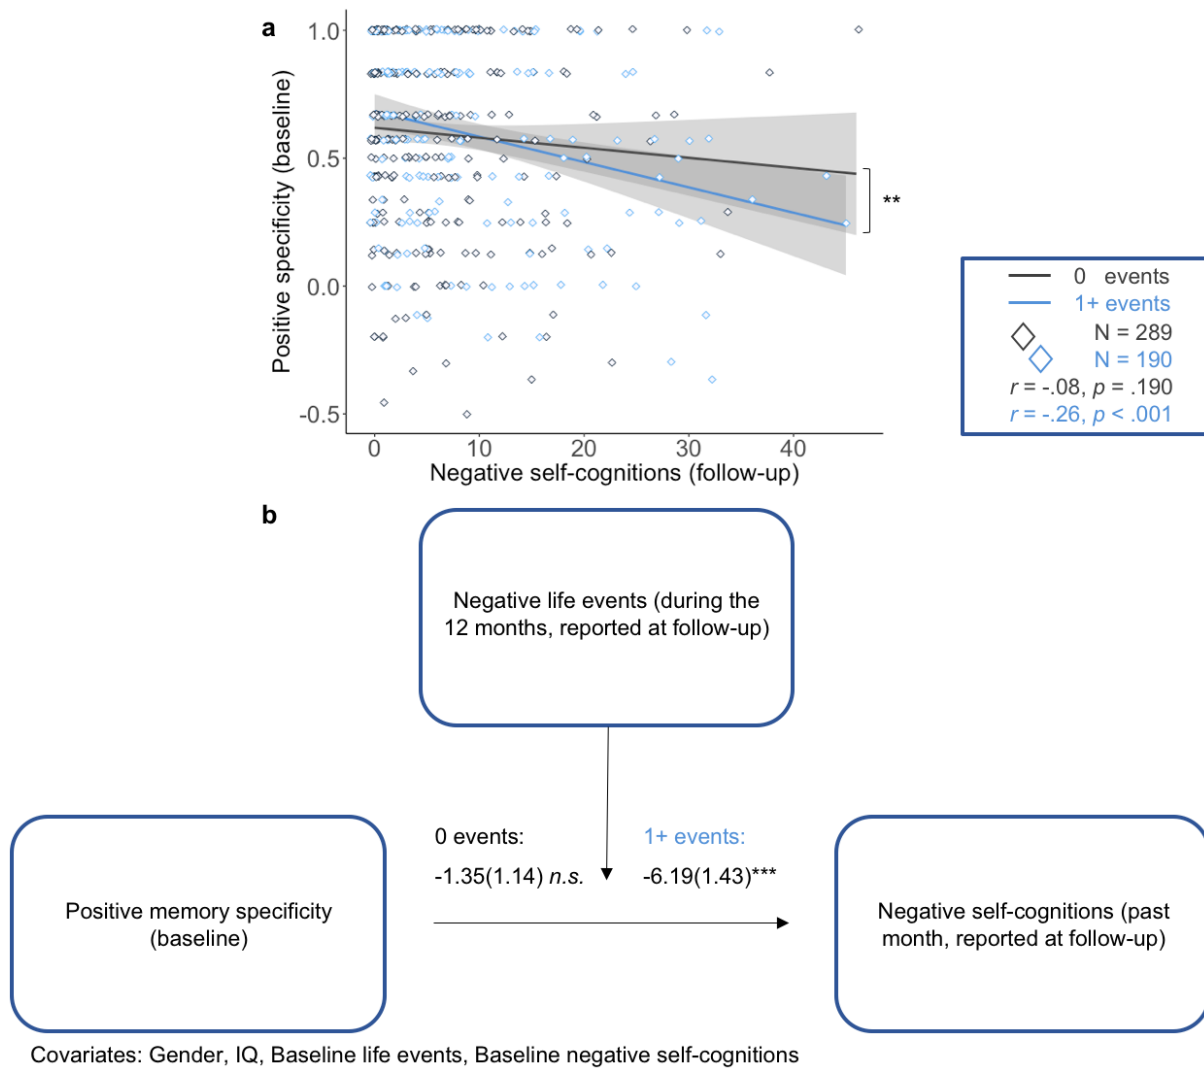

**Figure 2. Positive memory specificity lowers negative self-cognitions after recent negative life events.**

Plot **a** is showing a significant interaction where the effect of positive memory specificity on negative self-cognitions depends on exposure to recent negative life events. Specifically, positive memory specificity is related to lower negative self-cognitions in those exposed to one or more recent negative life events (during the 12 months following baseline of the study; blue line). The relationship is not significant in those not exposed to recent negative life events (black line). Figure **b** shows these results as a moderation model. Path values represent unstandardized coefficients and bootstrapped standard errors; \* $P < .05$ ; \*\* $P < .01$ ; \*\*\* $P < .005$ ; *n.s.* not significant.

**Supplementary Table 1.** Descriptive statistics, and comparison of variable means between full sample (n = 643) and subsample (n = 479).

| Variable                                      | Subsample (n = 479) |       |         | Full sample (n = 643) |       |         | P    |
|-----------------------------------------------|---------------------|-------|---------|-----------------------|-------|---------|------|
|                                               | M                   | SD    | Min-max | M                     | SD    | Min-max |      |
| Age baseline                                  | 13.7                | 1.18  | 12-16   | 13.7                  | 1.17  | 12-16   | .848 |
| Age follow-up                                 | 14.7                | 1.18  | 13-17   | 14.7                  | 1.17  | 13-17   | .759 |
| Positive memory specificity                   | 0.60                | 0.36  | -0.5-1  | 0.59                  | 0.37  | -0.5-1  | .773 |
| IQ                                            | 103.56              | 16.77 | 59-151  | 102.54                | 16.46 | 59-151  | .308 |
| Depressive symptoms baseline                  | 17.68               | 9.04  | 0-55    | 17.98                 | 9.06  | 0-55    | .585 |
| Depressive symptoms follow-up                 | 14.57               | 9.34  | 0-58    | 14.87                 | 9.12  | 0-58    | .601 |
| Negative self-cognitions/mood ratio baseline  | 0.41                | 0.32  | 0-2.5   | 0.42                  | 0.32  | 0-2.5   | .575 |
| Negative self-cognitions/mood ratio follow-up | 0.34                | 0.31  | 0-1.6   | 0.34                  | 0.30  | 0-1.6   | .969 |
| Negative life events baseline                 | 0.89                | 1.07  | 0-4     | 0.89                  | 1.11  | 0-4     | .947 |
| Negative life events follow-up                | 0.64                | 0.64  | 0-7     | 0.64                  | 1.00  | 0-7     | .968 |

M = mean, SD = standard deviation



**Supplementary Table 2.** Longitudinal measurement invariance of morning cortisol. The configural model is the baseline comparison model, in which all parameters are freely estimated. In the metric model, all parameters are freely estimated apart from factor loadings, which are constrained to be equal across time points. The scalar model constrains the mean of each observed variable over time. If this step is satisfied, strong measurement invariance can be established. The means model constrains the mean of the latent factor over time, indicating whether there are any significant mean differences across measurements.

| <b>Model</b>         | <b><math>X^2</math></b> | <b>df</b> | <b>P</b> | <b>CFI</b> | <b>RMSEA</b> | <b>CFI delta</b> | <b>RMSEA delta</b> |
|----------------------|-------------------------|-----------|----------|------------|--------------|------------------|--------------------|
| Configural           | 17.779                  | 14        | NA       | 0.997      | 0.024        | NA               | NA                 |
| Metric vs Configural | 21.848                  | 17        | 0.2542   | 0.996      | 0.024        | 0.001            | 0.001              |
| Scalar vs Metric     | 22.004                  | 20        | 0.9843   | 0.998      | 0.014        | 0.002            | 0.010              |
| Means vs Scalar      | 23.533                  | 21        | 0.2163   | 0.998      | 0.016        | 0.000            | 0.001              |

Model = four hierarchical (nested) steps of increasingly more strict equality constraints,  $X^2$  = chi square difference, df = degrees of freedom, CFI = comparative fit index, RMSEA = the root mean squared error of approximation, CFI delta = difference in comparative fit index, RMSEA delta = difference in root mean squared error of approximation. Differences less than RMSEA delta = .015, or CFI delta = .01 are not considered significant, which indicates measurement invariance for that particular nested model comparison.

**Supplementary Table 3.** Positive memory specificity predicting negative self-cognitions and morning cortisol without outliers. Boys are coded as 1, girls as 2. Significant paths are bolded.

| Outcome                                  | Predictors                        | Estimate | S.E.  | z-value | P(> z )     |
|------------------------------------------|-----------------------------------|----------|-------|---------|-------------|
| <b>Morning cortisol (b)</b>              | Positive memory specificity (b)   | -0.257   | 0.150 | -1.712  | .087        |
|                                          | Negative life events (b)          | -0.041   | 0.045 | -0.920  | .358        |
|                                          | Gender (b)                        | 0.736    | 0.108 | 6.846   | <b>.000</b> |
|                                          | IQ (b)                            | -0.001   | 0.003 | -0.436  | .663        |
| <b>Morning cortisol (f)</b>              | Morning cortisol (b)              | 0.228    | 0.038 | 5.988   | <b>.000</b> |
|                                          | Positive memory specificity (b)   | -0.277   | 0.113 | -2.463  | <b>.014</b> |
|                                          | Negative self-cognitions/mood (b) | 0.164    | 0.139 | 1.180   | .238        |
|                                          | Negative life events (b)          | -0.006   | 0.042 | -0.152  | .879        |
|                                          | Negative life events (f)          | 0.142    | 0.049 | 2.893   | .004        |
|                                          | Gender (b)                        | 0.310    | 0.088 | 3.507   | <b>.000</b> |
|                                          | IQ (b)                            | 0.008    | 0.002 | 3.249   | <b>.001</b> |
| <b>Negative self-cognitions/mood (b)</b> | Positive memory specificity (b)   | -0.063   | 0.037 | -1.704  | .088        |
|                                          | Negative life events (b)          | 0.026    | 0.015 | 1.779   | .075        |
|                                          | Gender (b)                        | 0.028    | 0.027 | 1.013   | .311        |
|                                          | IQ (b)                            | -0.000   | 0.001 | -0.158  | .075        |
| <b>Negative self-cognitions/mood (f)</b> | Negative self-cognitions/mood (b) | 0.407    | 0.041 | 9.886   | <b>.000</b> |
|                                          | Positive memory specificity (b)   | -0.099   | 0.033 | -3.038  | <b>.002</b> |
|                                          | Morning cortisol (b)              | -0.021   | 0.011 | -1.910  | .056        |
|                                          | Negative life events (b)          | 0.022    | 0.011 | 2.076   | <b>.038</b> |
|                                          | Negative life events (f)          | 0.026    | 0.015 | 1.712   | .087        |
|                                          | Gender (b)                        | 0.014    | 0.027 | 0.516   | .606        |
|                                          | IQ (b)                            | 0.000    | 0.001 | 0.371   | .711        |
| <b>Morning cortisol (b) ~</b>            | Negative self-cognitions/mood (b) | -0.016   | 0.014 | 1.137   | .256        |
| <b>Morning cortisol (f) ~</b>            | Negative self-cognitions/mood (f) | -0.012   | 0.009 | -1.361  | .173        |

(b) = baseline, (f) = follow-up. Boys are coded as 1, girls as 2. Significant paths are bolded. Robust model fit indices:  $\chi^2_{26} = 264.455$ ,  $P < 0.001$ , CFI = 0.995, TLI = 0.932, RMSEA = 0.038[0.000-0.113], SRMR = 0.013. Estimate = unstandardised coefficient, S.E. = robust standard error, z-value = standardised coefficient.

**Supplementary Table 4.** To rule out selective attrition as an explanation for the results, we ran a structural equation model using the Full Information Maximum Likelihood method and a robust estimator to handle missing data. The model is penalised for all estimated parameters.

| <b>Outcome</b>                           | <b>Predictors</b>                 | <b>Estimate</b> | <b>S.E.</b> | <b>z-value</b> | <b>P(&gt; z )</b> |
|------------------------------------------|-----------------------------------|-----------------|-------------|----------------|-------------------|
| <b>Morning cortisol (b)</b>              | Cortisol day 1 (b)                | 1.000           |             |                |                   |
|                                          | Cortisol day 2 (b)                | 1.048           | 0.077       | 13.651         | <b>.001</b>       |
|                                          | Cortisol day 3 (b)                | 1.135           | 0.092       | 12.276         | <b>.001</b>       |
|                                          | Cortisol day 4 (b)                | 0.984           | 0.083       | 11.877         | <b>.001</b>       |
| <b>Morning cortisol (f)</b>              | Cortisol day 1 (f)                | 1.000           |             |                |                   |
|                                          | Cortisol day 2 (f)                | 0.931           | 0.107       | 8.718          | <b>.001</b>       |
|                                          | Cortisol day 3 (f)                | 0.924           | 0.103       | 8.934          | <b>.001</b>       |
|                                          | Cortisol day 4 (f)                | 0.924           | 0.103       | 8.939          | <b>.001</b>       |
| <b>Morning cortisol (b)</b>              | Positive memory specificity (b)   | -0.250          | 0.137       | -1.833         | .067              |
|                                          | Negative life events (b)          | 0.040           | 0.044       | 0.924          | .356              |
|                                          | Gender (b)                        | 0.770           | 0.103       | 7.508          | <b>.001</b>       |
|                                          | IQ (b)                            | 0.004           | 0.003       | 1.481          | .138              |
| <b>Morning cortisol (f)</b>              | Morning cortisol (b)              | 0.637           | 0.120       | 5.308          | <b>.001</b>       |
|                                          | Positive memory specificity (b)   | -0.395          | 0.178       | -2.217         | <b>.027</b>       |
|                                          | Negative self-cognitions/mood (b) | 0.335           | 0.202       | 1.661          | .097              |
|                                          | Negative life events (b)          | 0.065           | 0.062       | 1.055          | .291              |
|                                          | Negative life events (f)          | 0.001           | 0.057       | 0.025          | .980              |
|                                          | Gender (b)                        | 0.299           | 0.139       | 2.146          | <b>.032</b>       |
|                                          | IQ (b)                            | 0.008           | 0.004       | 2.283          | <b>.022</b>       |
| <b>Negative self-cognitions/mood (b)</b> | Positive memory specificity (b)   | -0.067          | 0.034       | -1.957         | .050              |
|                                          | Negative life events (b)          | 0.022           | 0.010       | 2.097          | <b>.036</b>       |
|                                          | Gender (b)                        | 0.059           | 0.023       | 2.618          | <b>.009</b>       |
|                                          | IQ (b)                            | -0.000          | 0.001       | -0.727         | .467              |
| <b>Negative self-cognitions/mood (f)</b> | Negative self-cognitions/mood (b) | 0.395           | 0.044       | 8.934          | <b>.001</b>       |
|                                          | Positive memory specificity (b)   | -0.090          | 0.031       | -2.895         | <b>.004</b>       |
|                                          | Morning cortisol (b)              | -0.012          | 0.010       | -1.208         | .227              |
|                                          | Negative life events (b)          | 0.016           | 0.008       | 1.968          | <b>.049</b>       |
|                                          | Negative life events (f)          | 0.021           | 0.009       | 2.224          | <b>.026</b>       |
|                                          | Gender (b)                        | 0.042           | 0.023       | 1.841          | .066              |
|                                          | IQ (b)                            | -0.000          | 0.001       | -0.827         | .408              |
| <b>Morning cortisol (b) ~</b>            | Negative self-cognitions/mood (b) | 0.001           | 0.015       | 0.075          | .940              |
| <b>Morning cortisol (f) ~</b>            | Negative self-cognitions/mood (f) | -0.001          | 0.016       | -0.078         | .938              |

n = 479. (b) = baseline, (f) = follow-up. Boys are coded as 1, girls as 2. Significant paths are bolded. Robust model fit indices:  $\chi^2_{95} = 1789.904$ ,  $P < 0.001$ , CFI = 0.984, TLI = 0.976, RMSEA = 0.012[0.006-0.017], SRMR = 0.024. Estimate = unstandardised coefficient, S.E. = robust standard error, z-value = standardised coefficient.

**Supplementary Table 5.** Results of moderation and moderated mediation models without covariates and with outliers excluded. The index of the moderated mediation (ab) is significant for confidence intervals that do not include 0. All significant values are bolded.

| Path | Predictor  | Moderator  | Mediator       | Outcome        | Effect | S.E.  | df  | t      | 95% CI                  | P(> z)      |
|------|------------|------------|----------------|----------------|--------|-------|-----|--------|-------------------------|-------------|
| c1   | Pos memory | 0 events   |                | Neg cognitions | -1.442 | 1.060 | 435 | -1.360 | [0.175; -3.525]         | .642        |
| c2   | Pos memory | 1+ events  |                | Neg cognitions | -5.964 | 1.470 | 435 | -4.058 | [-8.852; -3.076]        | <b>.001</b> |
| a1   | Pos memory | 0 events   | Neg cognitions |                | -1.442 | 1.060 | 435 | -1.360 | [-3.525; 0.642]         | .175        |
| a2   | Pos memory | 1+ events  | Neg cognitions |                | -5.619 | 1.470 | 435 | -4.059 | <b>[-8.852; -3.076]</b> | <b>.001</b> |
| b    |            |            | Neg cognitions | Dep sympt      | 0.736  | 0.044 | 436 | 16.679 | <b>[0.650; 0.823]</b>   | <b>.001</b> |
| ab   | Pos memory | Neg events | Neg cognitions | Dep sympt      | -3.330 | 1.582 | 436 |        | <b>[-6.457; -0.329]</b> |             |
| c'   | Pos memory | Neg events | Neg cognitions | Dep sympt      | 0.516  | 0.819 | 436 | 0.630  | [-1.094; 2.125]         | .529        |
| a1   | Pos memory | 0 events   | Dep sympt      |                | -1.220 | 1.257 | 435 | -0.971 | [-3.690; 1.250]         | .332        |
| a2   | Pos memory | 1+ events  | Dep sympt      |                | -1.742 | 1.742 | 435 | -1.487 | [-5.524; 0.390]         | .138        |
| b    |            |            | Dep sympt      | Neg cognitions | 0.529  | 0.032 | 436 | 16.679 | <b>[0.467; 0.591]</b>   | <b>.001</b> |
| ab   | Pos memory | Neg events | Dep sympt      | Neg cognitions | -0.725 | 1.262 | 436 |        | [-3.181; 1.787]         |             |
| c'   | Pos memory | Neg events | Dep sympt      | Neg cognitions | -2.094 | 0.687 | 436 | -3.048 | <b>[-3.444; -0.744]</b> | <b>.002</b> |

Predictor: baseline, moderator: between baseline and follow-up, mediator and outcome: follow-up. Pos memory = positive memory specificity, Neg events = negative life events, Neg cognitions = negative self-cognitions, Dep sympt = depressive symptoms. Levels of the moderator are 0 (no events) and 1+ (one or more events). Path a1/a2 = conditional effect of predictor on mediator, b = relationship between mediator and outcome, ab = indirect effect of predictor on outcome, through mediator, c' = direct effect of predictor on outcome controlling for the indirect effect, c1/c2 = conditional direct effect of predictor on outcome. Effect = standardised coefficient, S.E. = bootstrapped standard error, df = degrees of freedom, 95 % CI = 95 % bootstrapped confidence interval of the estimate.
